# Supplementary material for: The Elemental Composition of Demospongiae from the Red Sea, Gulf of Aqaba
Source: PubMed Central journal article supplement (PMC3997428; doi:10.1371/journal.pone.0095775), 2014-04-23
Supplement: pone.0095775.s004.pdf [file pone.0095775.s004.pdf]

| Species                        | Al          | As            | B          | Ba           | Cd           | Co           | Cr           | Cu           | Fe           | Li           | Mn           | Mo           | Ni           | P            | S              | Se           | Ti           | V            | Zn          |
|--------------------------------|-------------|---------------|------------|--------------|--------------|--------------|--------------|--------------|--------------|--------------|--------------|--------------|--------------|--------------|----------------|--------------|--------------|--------------|-------------|
| <i>A. chloros</i><br>n=11      | 22<br>115   | 8.34<br>42    | 19.0<br>88 | 0.56<br>5.95 | 0.25<br>1.54 | 0.16<br>0.64 | 0.20<br>1.64 | 2.25<br>11.3 | 29<br>797    | 0.44<br>2.06 | 1.33<br>9.7  | 0.19<br>4.91 | 1.32<br>4.9  | 460<br>3549  | 7021<br>39007  | 0.92<br>6.59 | 0.91<br>24   | 0.16<br>2.03 | 11.2<br>56  |
| <i>C. paralia</i><br>n=8       | 41<br>305   | 8<br>36       | 41<br>84   | 0.80<br>5.63 | 0.20<br>1.11 | 0.16<br>0.36 | 0.50<br>6.54 | 8.81<br>22   | 128<br>660   | 0.51<br>1.82 | 1.65<br>16.8 | 0.17<br>0.66 | 2.69<br>6    | 937<br>4973  | 10287<br>33047 | 1.12<br>6.45 | 2.57<br>25   | 0.21<br>2.93 | 30<br>124   |
| <i>Callyspongia</i> sp.<br>n=9 | 81<br>387   | 17.1<br>42    | 47<br>101  | 1.45<br>18   | 0.52<br>1.84 | 0.48<br>1.1  | 0.43<br>3.99 | 13.1<br>29   | 90<br>434    | 0.27<br>1.86 | 5.11<br>18.8 | 0.53<br>1.30 | 4.05<br>6.9  | 1861<br>3821 | 22163<br>32025 | 2.60<br>6.21 | 3.33<br>17.7 | 0.52<br>3.02 | 48<br>108   |
| <i>C. cyatophora</i><br>n=7    | 62<br>175   | 4.32<br>13    | 181<br>279 | 1.73<br>3.22 | 0.04<br>0.25 | 0.03<br>0.16 | 0.22<br>1.65 | 1.64<br>5.14 | 161<br>219   | 0.72<br>0.92 | 2.15<br>6.83 | 0.19<br>0.70 | 0.43<br>1.4  | 3296<br>4841 | 14486<br>21272 | 3.94<br>4.68 | 1.17<br>5.48 | 0.29<br>0.90 | 15.2<br>39  |
| <i>D. erythraenus</i><br>n=9   | 22<br>123   | 17.8<br>57    | 14.6<br>41 | 0.43<br>2.9  | 0.25<br>0.4  | 0.54<br>2.05 | 0.19<br>1.92 | 4.60<br>15.7 | 127<br>222   | 0.20<br>1.03 | 5.76<br>11.4 | 1.17<br>2.14 | 18.4<br>37   | 3318<br>5700 | 10800<br>18762 | 7.88<br>12.6 | 0.51<br>1.3  | 0.17<br>0.6  | 27<br>83    |
| <i>Haliclona</i> sp.1<br>n=9   | 21<br>171   | 2.30<br>18    | 26<br>79   | 1.63<br>10.5 | 1.28<br>3.25 | 0.10<br>0.7  | 0.09<br>0.6  | 5.15<br>13.5 | 150<br>834   | 0.15<br>2.05 | 1.23<br>10.8 | 0.10<br>1.93 | 1.20<br>6.2  | 2391<br>4972 | 13663<br>26315 | 3.66<br>9    | 0.72<br>4.97 | 0.40<br>0.92 | 65<br>249   |
| <i>Haliclona</i> sp.2<br>n=4   | 99<br>128   | 8.28<br>19    | 21<br>212  | 2.22<br>3.85 | 0.70<br>0.87 | 0.32<br>0.97 | 0.72<br>0.84 | 24.5<br>33   | 244<br>435   | 0.50<br>2.25 | 3.96<br>9.3  | 0.10<br>1.56 | 2.39<br>4.7  | 1544<br>2517 | 14197<br>19491 | 3.49<br>4.9  | 5.30<br>8.9  | 0.80<br>1.4  | 109<br>271  |
| <i>H. arabica</i><br>n=5       | 263<br>712  | 6.38<br>24    | 114<br>145 | 2.98<br>10.8 | 0.07<br>0.41 | 0.14<br>0.96 | 0.73<br>4.52 | 10.8<br>25   | 249<br>2906  | 0.93<br>3.68 | 8.71<br>64   | 0.08<br>0.41 | 0.73<br>2.3  | 3700<br>5453 | 11820<br>17146 | 2.39<br>5.17 | 3.55<br>32   | 0.72<br>1.90 | 25<br>57    |
| <i>H. erecta</i><br>n=3        | 694<br>2538 | 13.8<br>17    | 34<br>51   | 9.42<br>19.9 | 0.24<br>0.59 | 0.89<br>1.97 | 2.77<br>5.34 | 12.4<br>39   | 1413<br>1763 | 1.56<br>2.87 | 44.8<br>69   | 2.60<br>3.30 | 6.68<br>14.2 | 1696<br>2770 | 12382<br>16212 | 5.56<br>9.7  | 56<br>114    | 4.63<br>6.4  | 219<br>385  |
| <i>N. magnifica</i><br>n=6     | 26<br>87    | 6.30<br>68    | 24<br>47   | 1.04<br>5.63 | 1.14<br>2.25 | 0.07<br>0.13 | 0.08<br>1.26 | 3.07<br>10.2 | 89<br>172    | 0.50<br>0.77 | 2.54<br>3.83 | 0.13<br>0.24 | 0.43<br>2.1  | 3460<br>5134 | 10678<br>15923 | 4.20<br>8.68 | 1.02<br>3.21 | 0.13<br>0.49 | 28<br>56    |
| <i>N. rowi</i><br>n=14         | 45<br>284   | 8.41<br>73    | 25<br>93   | 0.88<br>4.5  | 0.07<br>0.7  | 0.55<br>8.5  | 0.24<br>2.36 | 7.63<br>26   | 219<br>811   | 0.33<br>2.04 | 2.56<br>7    | 0.14<br>0.60 | 10.6<br>112  | 556<br>3351  | 6537<br>25413  | 0.17<br>3.1  | 3.03<br>18.5 | 0.22<br>6.72 | 32<br>441   |
| <i>S. siphonella</i><br>n=8    | 43<br>531   | 11.9<br>24    | 47<br>205  | 1.50<br>6.81 | 0.36<br>2.17 | 0.16<br>0.40 | 0.60<br>6.39 | 7.20<br>47   | 273<br>768   | 1.50<br>4.13 | 4.50<br>10.8 | 0.35<br>1.04 | 1.40<br>7.8  | 3029<br>6013 | 21984<br>52986 | 1.14<br>2.88 | 3.01<br>15   | 0.69<br>1.45 | 67<br>216   |
| <i>S. carteri</i><br>n=4       | 63<br>122   | 2.10<br>2.68  | 16.1<br>27 | 1.60<br>4.73 | 0.10<br>0.3  | 0.10<br>0.3  | 0.10<br>0.4  | 25.7<br>35   | 219<br>258   | 0.30<br>0.60 | 2.10<br>2.7  | 0.10<br>0.40 | 0.98<br>3.5  | 1724<br>2480 | 12512<br>15185 | 3.74<br>6.8  | 1.30<br>3.97 | 0.60<br>0.8  | 45<br>67    |
| <i>S. clavatus</i><br>n=7      | 18<br>198   | 0.95<br>2.76  | 9.21<br>28 | 0.17<br>2.07 | 2.79<br>7.57 | 11<br>41     | 0.08<br>1.33 | 1.54<br>3.81 | 810<br>1418  | 0.22<br>0.57 | 4.54<br>12.2 | 0.01<br>0.02 | 267<br>782   | 440<br>765   | 3378<br>9109   | N.D          | 0.74<br>4.63 | 0.20<br>1.38 | 563<br>1147 |
| <i>T. swinhoei</i><br>n=7      | 92<br>783   | 2572<br>19646 | 36<br>89   | 126<br>17169 | 0.09<br>0.59 | 0.74<br>2.11 | 0.30<br>0.96 | 5.44<br>12.5 | 224<br>442   | 0.19<br>1.41 | 6.38<br>17.4 | 1.11<br>3.37 | 11.3<br>26   | 2301<br>6522 | 5165<br>15036  | 15.9<br>38   | 6.09<br>21   | 0.62<br>1.75 | 15.8<br>55  |
| <i>T. aqabaensis</i><br>n=8    | 57<br>220   | 0.82<br>13.8  | 6.62<br>22 | 1.04<br>3.75 | 0.04<br>0.19 | 0.47<br>4.4  | 0.88<br>2.55 | 3.36<br>8.32 | 183<br>848   | 0.42<br>1.21 | 2.82<br>9.3  | N.D          | 1.64<br>3.9  | 941<br>1534  | 2955<br>11686  | N.D          | 3.99<br>24   | 0.81<br>2.72 | 9.6<br>26   |
